# Supplementary material for: Imidazopyridine–fluoride interaction: solvent-switched AIE effects via S⋯O conformational locking
Source: Royal Society of Chemistry journal article supplement (doi:10.1039/d2nj00561a), 2022-01-01
Supplement: d2nj00561a1.pdf [file d2nj00561a1.pdf]

## Electronic Supporting Information

### Imidazopyridine-Fluoride Interaction: Solvent-switched AIE Effect via S...O Conformational Locking

Annu Kumari<sup>a</sup>, Wim Dehaen<sup>b</sup>, Deepak Chopra<sup>\*c</sup>, and Swapan Dey<sup>\*a</sup>

<sup>a</sup>Department of Chemistry and Chemical Biology, Indian Institute of Technology (ISM), Dhanbad 826004, India. Email: [swapan@iitism.ac.in](mailto:swapan@iitism.ac.in)

<sup>b</sup>Molecular Design & Synthesis, Department of Chemistry, KU Leuven, Celestijnenlaan 200F, B-3001 Leuven, Belgium

<sup>c</sup>Crystallography & Crystal Chemistry Laboratory, Department of Chemistry, IISER Bhopal, 462066, India. Email: [dchopra@iiserb.ac.in](mailto:dchopra@iiserb.ac.in)

| Table of Contents:                                              | Page  |
|-----------------------------------------------------------------|-------|
| 1. Crystal data of C1, C2, C1.S and C2.S and H-bonding data     | 2-3   |
| 2. Spectroscopic characterization of compounds                  | 4-8   |
| 3. LOD, binding constant, and stoichiometry                     | 8-10  |
| 4. Emission titration                                           | 10-11 |
| 5. The peculiar behavior of C1 in CHCl <sub>3</sub>             | 11    |
| 6. D <sub>2</sub> O exchange of compounds in <sup>1</sup> H NMR | 12-13 |
| 7. <sup>1</sup> H and <sup>19</sup> F NMR spectra of complexes  | 14-15 |
| 8. FT-IR spectroscopy                                           | 16    |
| 9. HR-MS spectrum of complexes                                  | 16-17 |
| 10. DFT calculated optimized structure                          | 18    |
| 11. Titration plot of carboxamide with CN <sup>-</sup>          | 18-19 |
| 12. FE-SEM image                                                | 20    |
| 13. References                                                  | 20    |

## Crystal data of C1, C2, C1.S, and C2.S and H-bonding data

**Table S1. Crystal data**

| Compound                                   | C1                                                             | C2                                                 | C1.S                                                               | C2.S                                                             |
|--------------------------------------------|----------------------------------------------------------------|----------------------------------------------------|--------------------------------------------------------------------|------------------------------------------------------------------|
| CCDC No.                                   | 2085440                                                        | 2085441                                            | 2085442                                                            | 2085443                                                          |
| Empirical formula                          | C <sub>15</sub> H <sub>9</sub> ClN <sub>4</sub> O <sub>5</sub> | C <sub>15</sub> H <sub>10</sub> ClN <sub>5</sub> O | C <sub>31</sub> H <sub>48</sub> Cl N <sub>5</sub> O <sub>3</sub> S | C <sub>31</sub> H <sub>49</sub> Cl N <sub>6</sub> O <sub>3</sub> |
| Formula weight                             | 328.77                                                         | 311.73                                             | 606.25                                                             | 589.21                                                           |
| Temperature/K                              | 292(2)                                                         | 292(2)                                             | 292(2)                                                             | 292(2)                                                           |
| Crystal system                             | Monoclinic                                                     | Triclinic                                          | Monoclinic                                                         | Orthorhombic                                                     |
| Space group                                | <i>P</i> 2 <sub>1</sub> / <i>c</i>                             | <i>P</i> -1                                        | <i>P</i> 2/ <i>c</i>                                               | <i>Pbcn</i>                                                      |
| a/Å                                        | 8.0687(8)                                                      | 6.5832(8)                                          | 23.0412(9)                                                         | 46.3890(18)                                                      |
| b/Å                                        | 6.5157(5)                                                      | 7.6795(10)                                         | 9.3628(4)                                                          | 9.2469(6)                                                        |
| c/Å                                        | 26.9123(17)                                                    | 13.7007(13)                                        | 15.7390(7)                                                         | 15.7793(9)                                                       |
| α/°                                        | 90                                                             | 97.024(9)                                          | 90                                                                 | 90                                                               |
| β/°                                        | 90.204(7)                                                      | 91.925(9)                                          | 98.319(4)                                                          | 90                                                               |
| γ/°                                        | 90                                                             | 96.046(10)                                         | 90                                                                 | 90                                                               |
| Volume/Å <sup>3</sup>                      | 1414.9(2)                                                      | 682.87(14)                                         | 3359.6(2)                                                          | 6768.6(6)                                                        |
| Z                                          | 4                                                              | 2                                                  | 4                                                                  | 8                                                                |
| ρ <sub>calc</sub> /cm <sup>3</sup>         | 1.543                                                          | 1.516                                              | 1.199                                                              | 1.156                                                            |
| μ/mm <sup>-1</sup>                         | 0.424                                                          | 0.289                                              | 0.213                                                              | 0.151                                                            |
| F(000)                                     | 672.0                                                          | 320.0                                              | 1304.0                                                             | 2544.0                                                           |
| Crystal size/mm <sup>3</sup>               | 0.13 × 0.12 × 0.11                                             | 0.068 × 0.056 × 0.044                              | 0.056 × 0.045 × 0.033                                              | 0.150 × 0.140 × 0.110                                            |
| Radiation                                  | MoKα (λ = 0.71073)                                             | MoKα (λ = 0.71073)                                 | MoKα (λ = 0.71073)                                                 | MoKα (λ = 0.71073)                                               |
| 2θ range/°                                 | 6.056 to 57.86                                                 | 5.378 to 50.992                                    | 5.076 to 57.802                                                    | 4.492 to 58.792                                                  |
| Index ranges                               | -10 ≤ h ≤ 9, -8 ≤ k ≤ 7, -35 ≤ l ≤ 32                          | -7 ≤ h ≤ 7, -8 ≤ k ≤ 9, -16 ≤ l ≤ 16               | -30 ≤ h ≤ 30, -10 ≤ k ≤ 12, -20 ≤ l ≤ 21                           | -63 ≤ h ≤ 59, -12 ≤ k ≤ 9, -17 ≤ l ≤ 21                          |
| Reflections collected                      | 15957                                                          | 4948                                               | 39938                                                              | 22943                                                            |
| Independent reflections                    | 3260 [R <sub>int</sub> = 0.0928]                               | 2536 [R <sub>int</sub> = 0.0266]                   | 7806 [R <sub>int</sub> = 0.0824]                                   | 8095 [R <sub>int</sub> = 0.066]                                  |
| Data/restraints/parameters                 | 3260/0/204                                                     | 2536/0/207                                         | 7806/0/390                                                         | 8095/50/407                                                      |
| Goodness-of-fit on F <sup>2</sup>          | 1.102                                                          | 1.026                                              | 1.012                                                              | 0.954                                                            |
| Final R indexes [I ≥ 2σ(I)]                | R <sub>1</sub> = 0.0902, wR <sub>2</sub> = 0.2512              | R <sub>1</sub> = 0.0530, wR <sub>2</sub> = 0.1037  | R <sub>1</sub> = 0.0560, wR <sub>2</sub> = 0.1362                  | R <sub>1</sub> = 0.0653, wR <sub>2</sub> = 0.1336                |
| Final R indexes [all data]                 | R <sub>1</sub> = 0.1044, wR <sub>2</sub> = 0.2578              | R <sub>1</sub> = 0.1089, wR <sub>2</sub> = 0.1274  | R <sub>1</sub> = 0.0925, wR <sub>2</sub> = 0.1523                  | R <sub>1</sub> = 0.2003, wR <sub>2</sub> = 0.1890                |
| Largest diff. peak/hole / eÅ <sup>-3</sup> | 0.55/-0.40                                                     | 0.20/-0.24                                         | 0.24/-0.29                                                         | 0.18/-0.28                                                       |

**Table S2: H-bonding data**

| Interactions         | D-H     | H···A (Å) | D···A (Å) | D-H···A (°) | Symmetry code  |
|----------------------|---------|-----------|-----------|-------------|----------------|
| <b>C1</b>            |         |           |           |             |                |
| <b>N3-H3 ...N2</b>   | 0.97(8) | 2.36(8)   | 2.744(8)  | 102(6)      | x,y,z          |
| <b>C1-H1 ...N2</b>   | 0.93    | 2.72      | 3.612(9)  | 162         | -x+2,-y,-z+1   |
| <b>C2-H2...N4</b>    | 0.93    | 2.86      | 3.735(10) | 158         | -x+2,-y,-z+1   |
| <b>C12-H12...O1</b>  | 0.93    | 2.65      | 3.366(10) | 134         | -x+1,-y+2,-z+1 |
| <b>C2</b>            |         |           |           |             |                |
| <b>N2-H2...O1</b>    | 0.83(3) | 2.32(3)   | 2.810(3)  | 118(3)      | x, y, z        |
| <b>N2-H2 ...O1</b>   | 0.83(3) | 2.46(3)   | 3.104(3)  | 136(3)      | -x,-y+1,-z+1   |
| <b>C13-H13 ...N1</b> | 0.93    | 2.65      | 3.544(4)  | 162         | -x+2,-y+2,-z+1 |
| <b>C14-H14 ...N5</b> | 0.93    | 2.71      | 3.610(4)  | 163         | -x+2,-y+2,-z+1 |
| <b>C1.S</b>          |         |           |           |             |                |
| <b>O2-H101...O3</b>  | 0.82(3) | 2.02(3)   | 2.837(3)  | 176(3)      | x, y, z        |
| <b>O3-H102 ...N3</b> | 0.86(3) | 2.08(3)   | 2.909(3)  | 162(3)      | x, y, z        |
| <b>C12-H12...O2</b>  | 0.93    | 2.62      | 3.199(3)  | 121         | -x+1,-y+1,-z+1 |
| <b>O2-H100...N2</b>  | 0.83(3) | 2.16      | 2.980(2)  | 169(3)      | x,+y-1,+z      |
| <b>O3-H103...N1</b>  | 0.81(3) | 2.37(4)   | 3.071(2)  | 146(3)      | x,+y-1,+z      |
| <b>C2.S</b>          |         |           |           |             |                |
| <b>O2-H2A ...N3</b>  | 0.84(4) | 2.17(4)   | 2.992(4)  | 166(4)      | x, y, z        |
| <b>O2-H2B...O3</b>   | 0.92(4) | 1.98(4)   | 2.861(4)  | 160(4)      | x, y, z        |
| <b>O3-H3C ...N5</b>  | 0.83(4) | 2.22(4)   | 2.925(4)  | 143(4)      | x, y, z        |
| <b>N4-H4 ...O1</b>   | 0.86    | 2.01      | 2.563(3)  | 121         | x, y, z        |
| <b>O3-H3B ...N2</b>  | 0.82(4) | 2.16(4)   | 2.941(4)  | 162(4)      | x,+y+1,+z      |
| <b>C2-H2 ...O2</b>   | 0.93    | 2.64      | 3.240(5)  | 123         | -x+1,-y+1,-z+2 |

## Spectroscopic characterization of compounds

Figure S1.  $^1\text{H}$ NMR (400MHz,  $\text{CDCl}_3$ ) of compound 1.

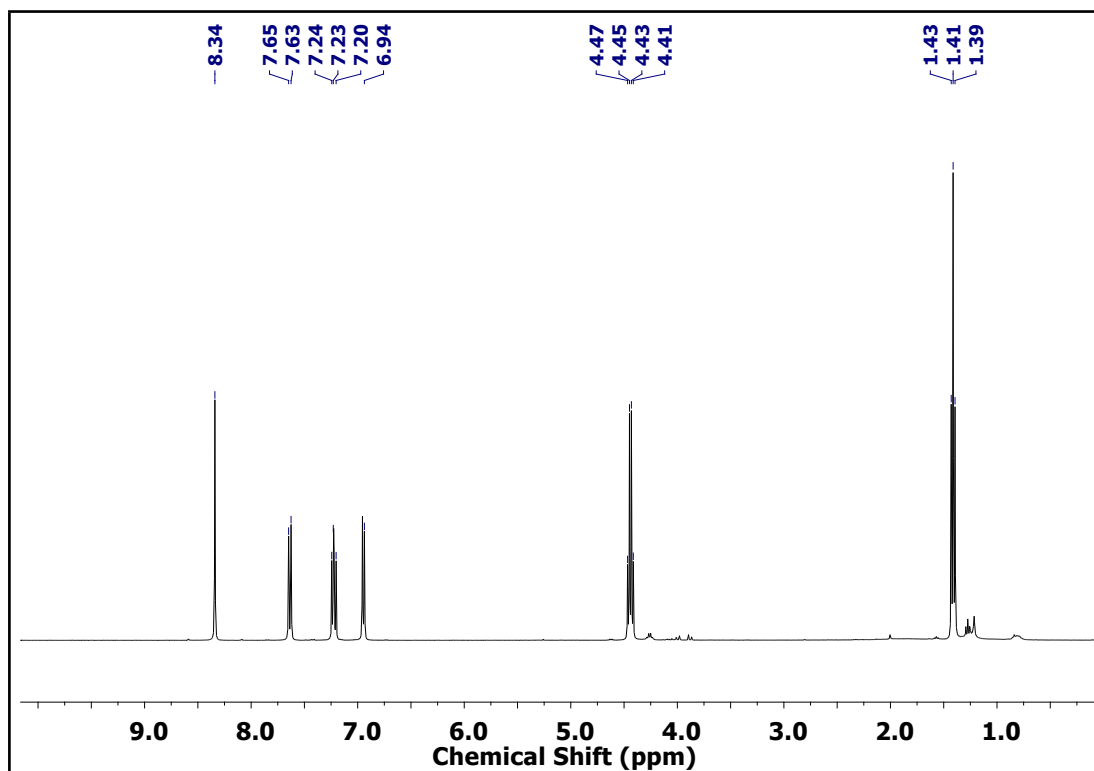

Figure S2.  $^{13}\text{C}$ NMR (100 MHz,  $\text{CDCl}_3$ ) of compound 1.

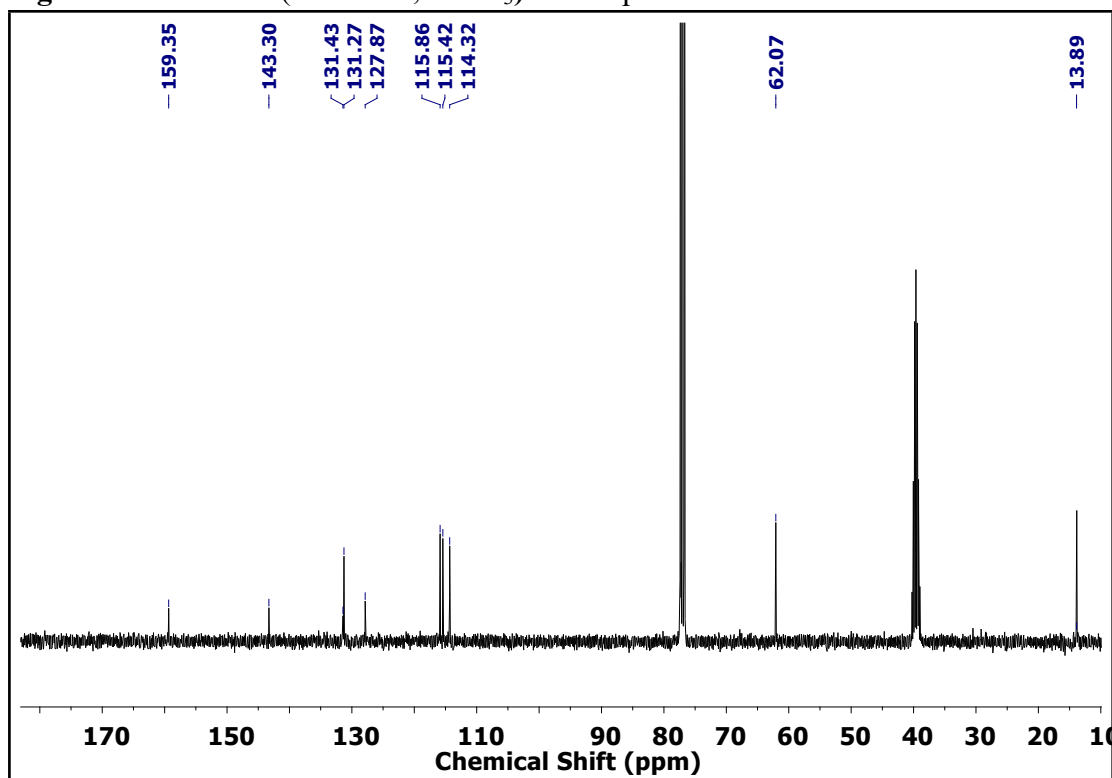

Figure S3.  $^1\text{H}$ NMR (400 MHz,  $d_6$ -DMSO) of compound C1.

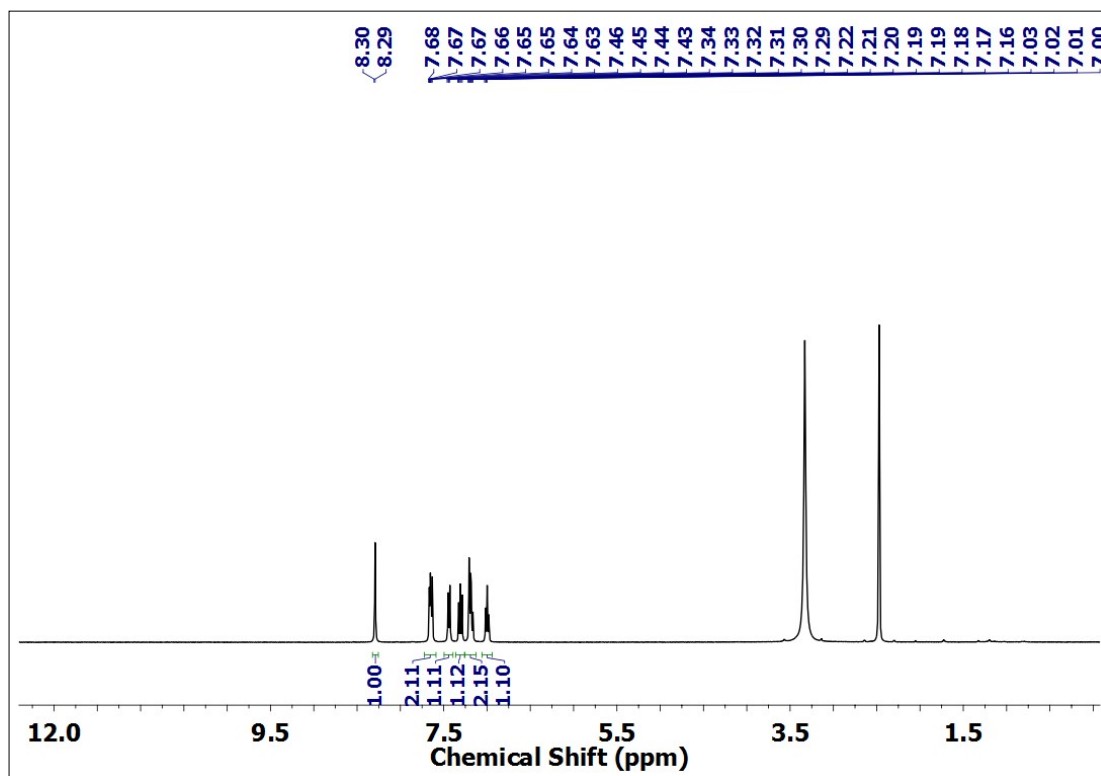

Figure S4.  $^{13}\text{C}$ NMR (100 MHz,  $d_6$ -DMSO) of compound C1.

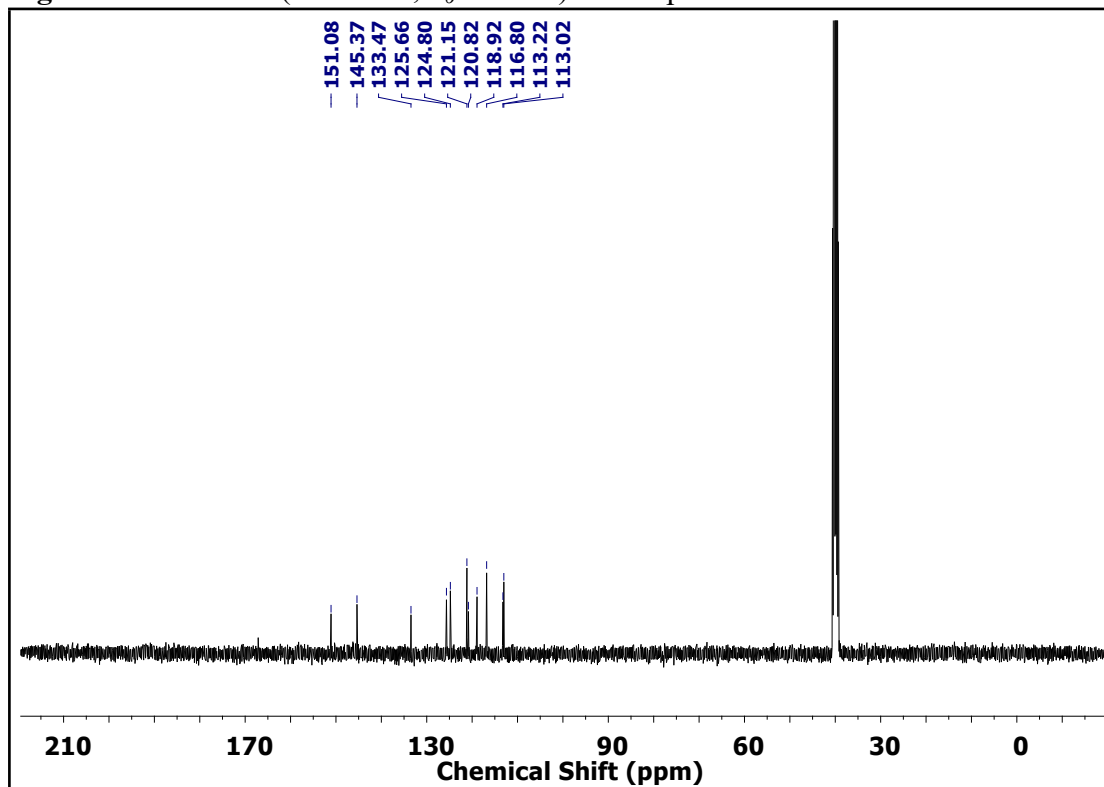

Figure S5.  $^1\text{H}$ NMR (400 MHz, DMSO) of compound C2.

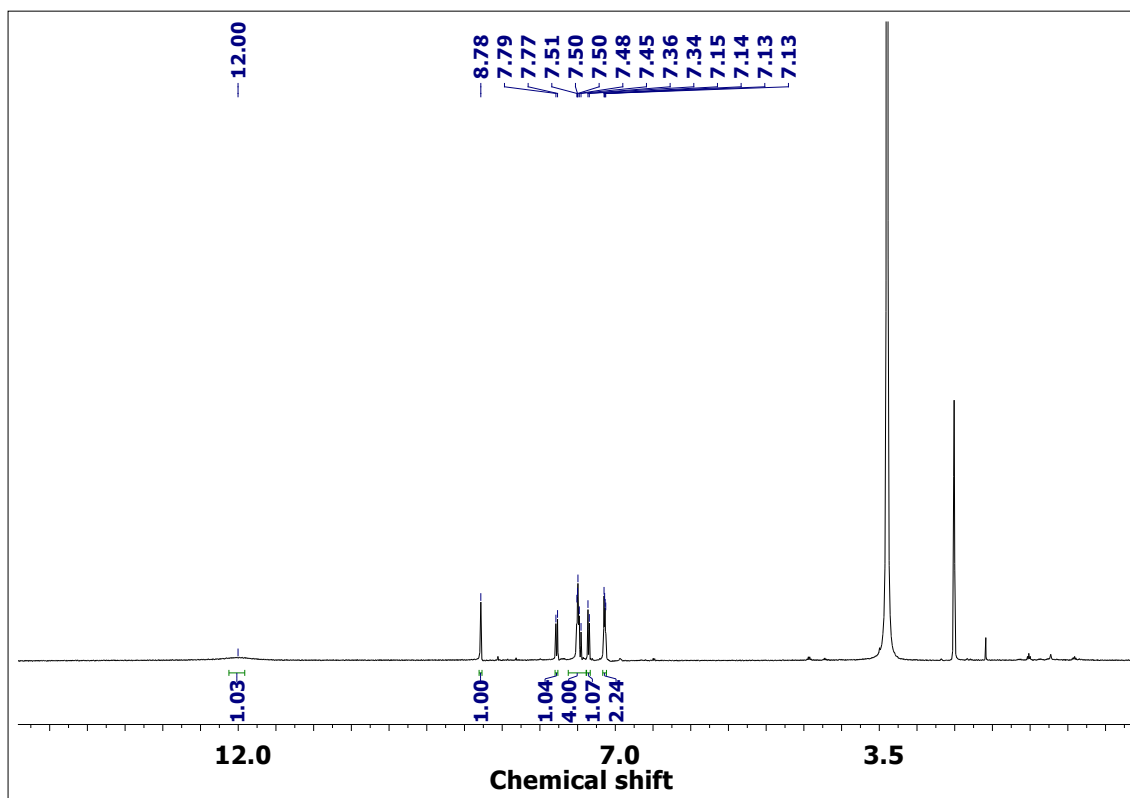

Figure S6.  $^1\text{H}$ NMR (400 MHz,  $\text{CDCl}_3$ ) of compound C2.

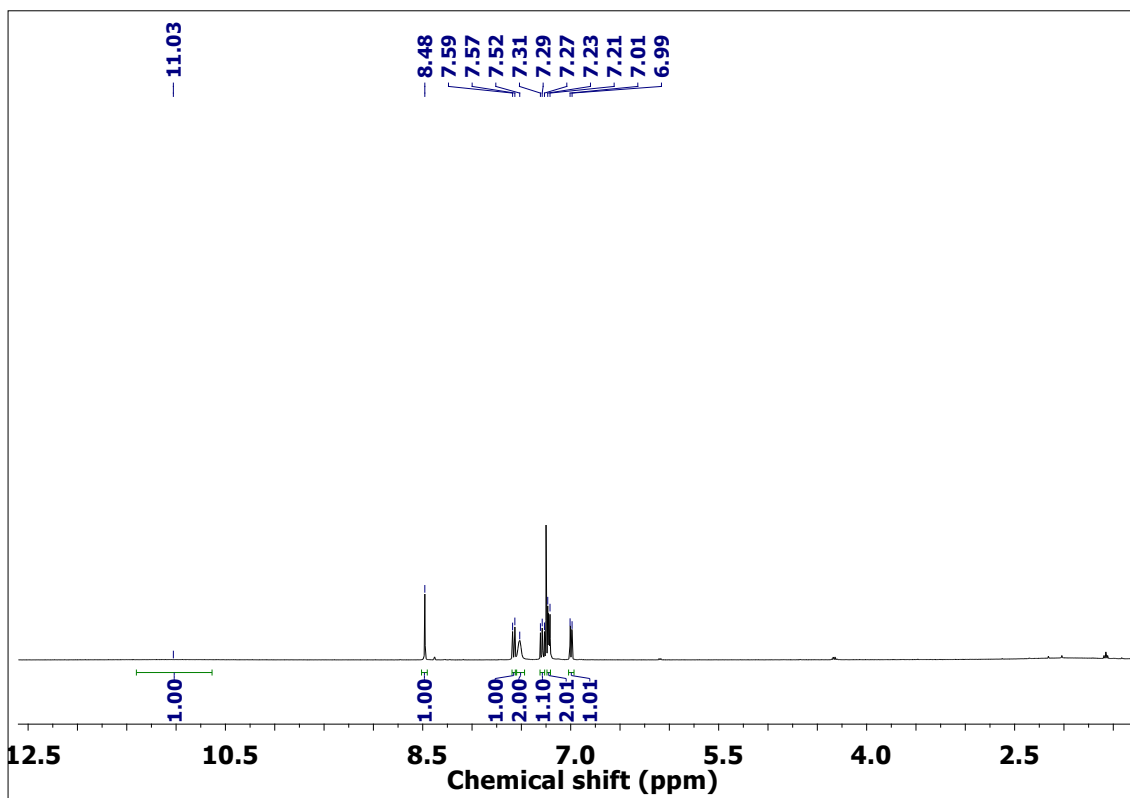

**Figure S7.**  $^{13}\text{C}$ NMR (100 MHz,  $\text{CDCl}_3$ ) of compound C2.

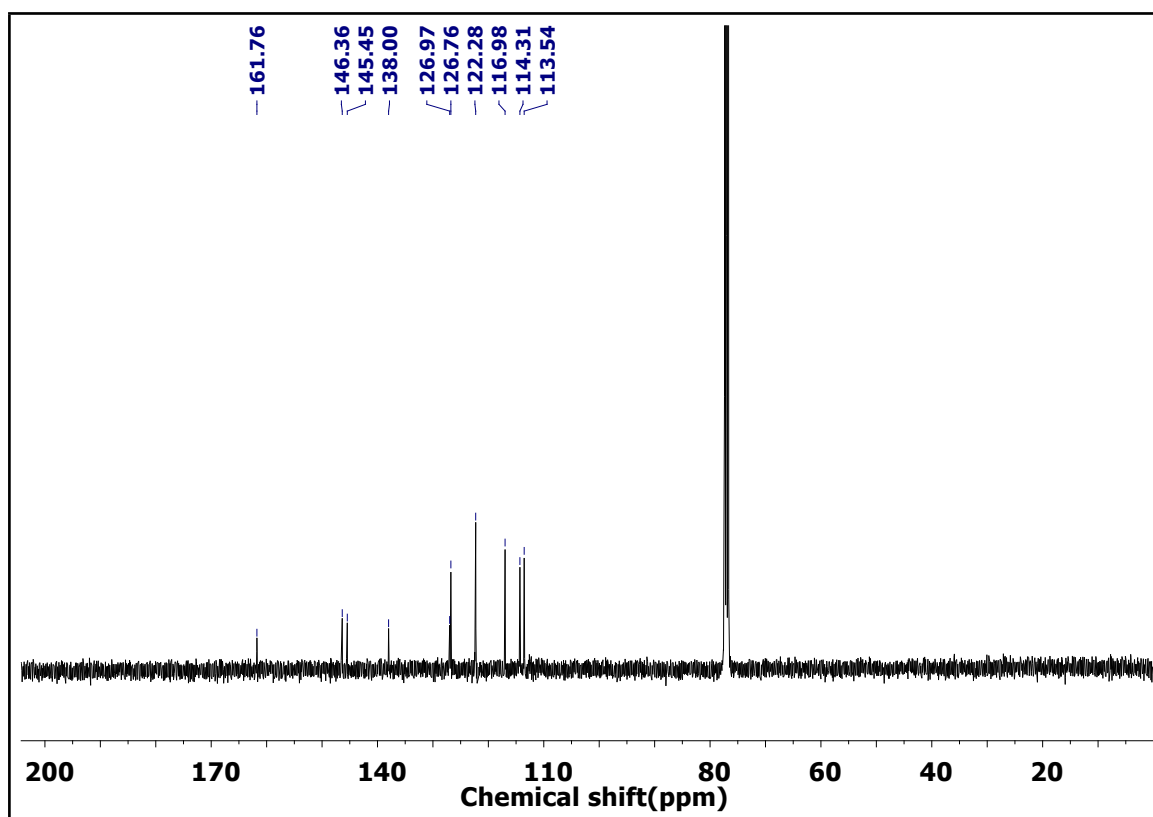

**Figure S8.** ESI-HRMS spectra of C1. The isotopic pattern at  $m/z = 351.0039$  can be attributed to  $[\text{C1.Na}^+]$  ( $m/z$ calculated = 351.0078).

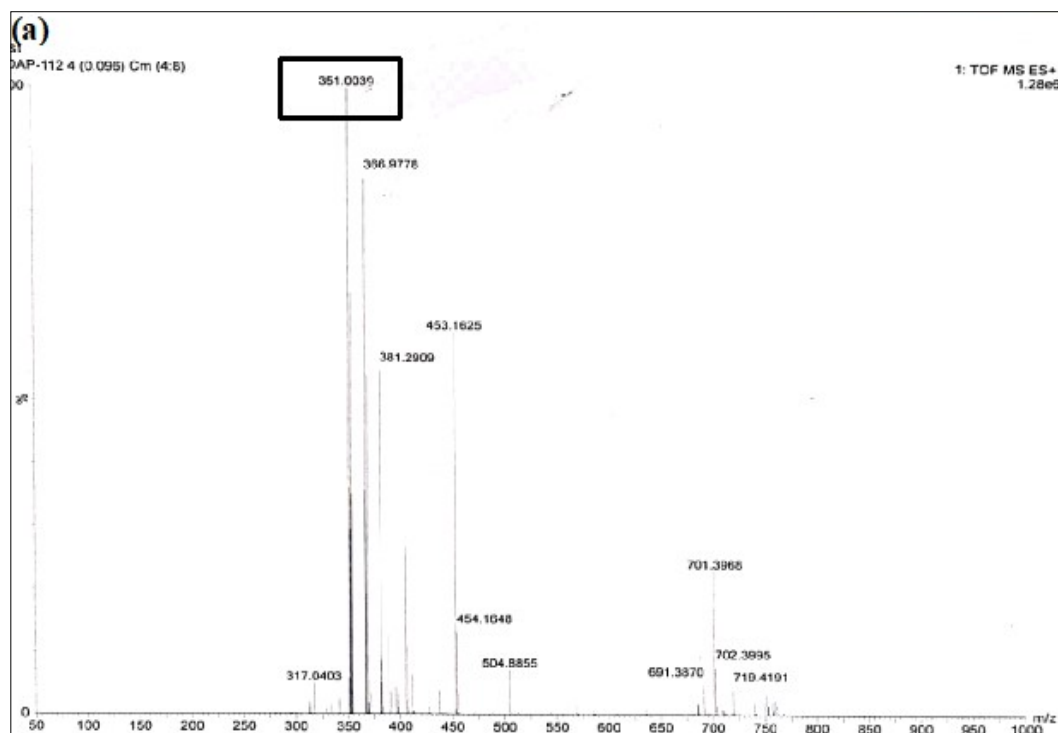

**Figure S9.** ESI-HRMS spectra of C2. The isotopic pattern at  $m/z= 312.0692$  can be attributed to  $[C_2.H^+]$  ( $m/z_{\text{calculated}} = 312.0647$ ).

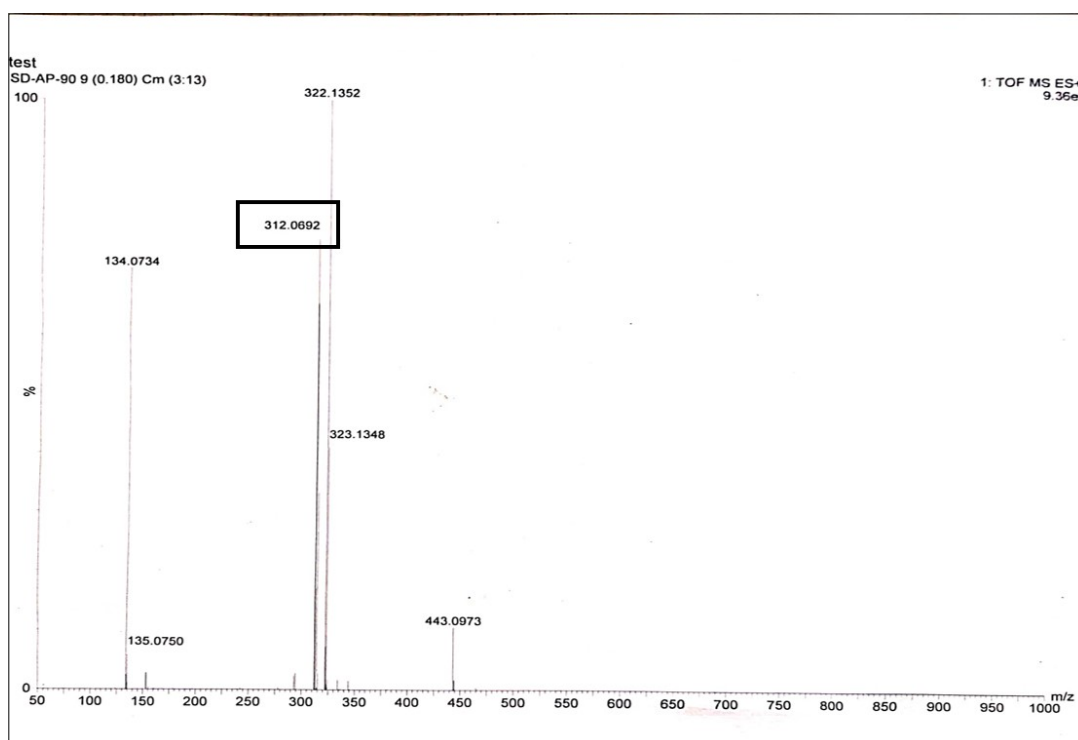

### LOD, binding constant, and stoichiometry

Evaluating absorption and emission data collected after titration gives binding constant and limit of detection. Binding constant calculated by employing

$$\text{Intercept/slope} = \text{Binding constant}$$

Values obtained by linear fitting the importance of  $1/\Delta\epsilon$  vs.  $1/[F^-]$ .

LOD of compounds were obtained by placing the equation

$$2\sigma/\text{slope}$$

Here,  $\sigma$  stand for the stander deviation of the regression line and slope obtained by the emission intensity vs. concentration plot.

**Figure S10.** We are calibrating linear fit curve<sup>1</sup> of emission at 444nmof C1 (Acetonitrile) to obtain (a) Binding constant ( $3.24 \times 10^3$ ) and (b) LOD ( $1.45 \times 10^{-6}$ ).



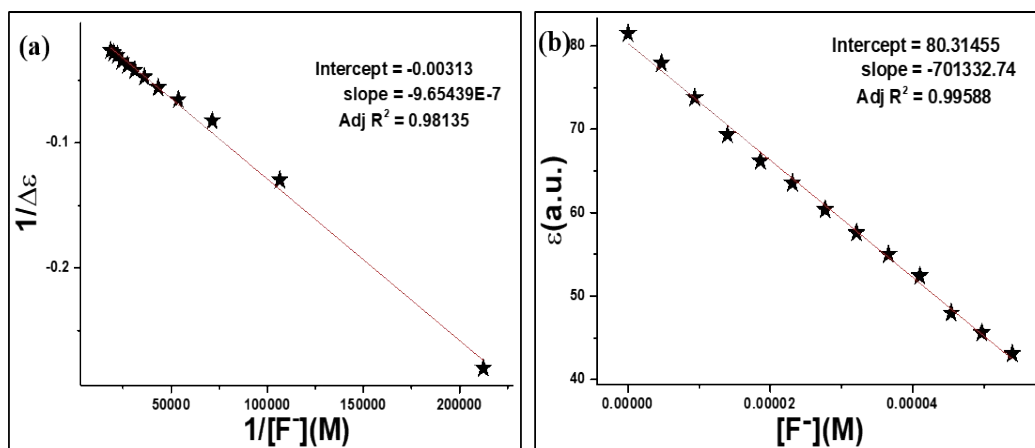

**Figure S11.** We are calibrating linear fit curve<sup>1</sup> of absorbance at 309nm of C1 (Acetonitrile) to obtain (a) Binding constant ( $1.55 \times 10^4$ ) and (b) LOD ( $2.46 \times 10^{-4}$ ).

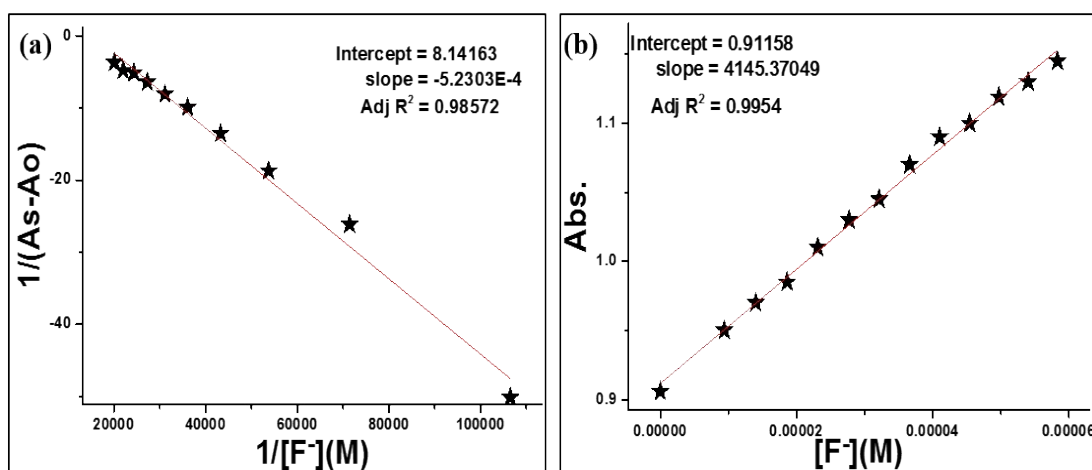

**Figure S12.** Calibrating linear fit curve<sup>1</sup> of emission at 422nm (water) of C2 to obtain (a) Binding constant ( $3.4 \times 10^3$ ), (b) LOD ( $9.8 \times 10^{-8}$ ).

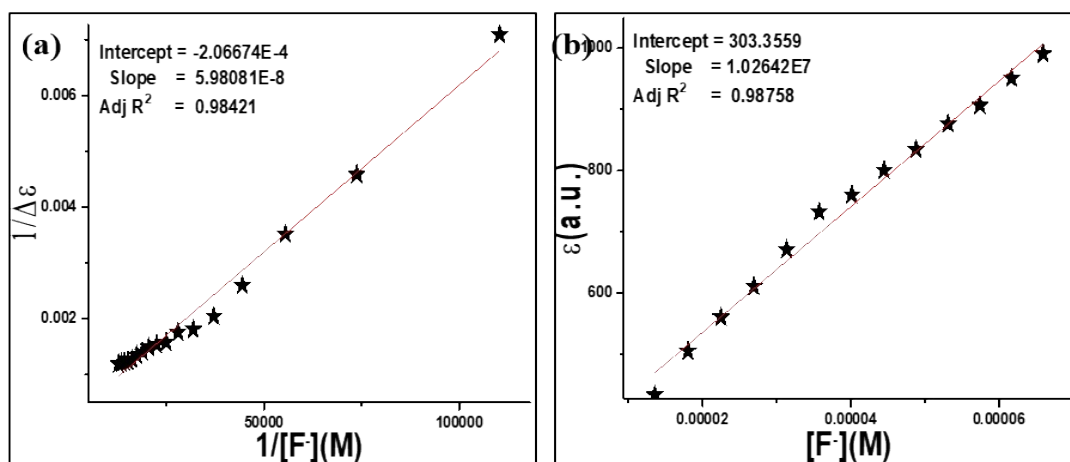

**Figure S13.** We are calibrating linear fit curve<sup>1</sup> of absorbance at 309nm of C2 to obtain (a) Binding constant ( $1.58 \times 10^5$ ) and (b) LOD ( $2.31 \times 10^{-5}$ ).

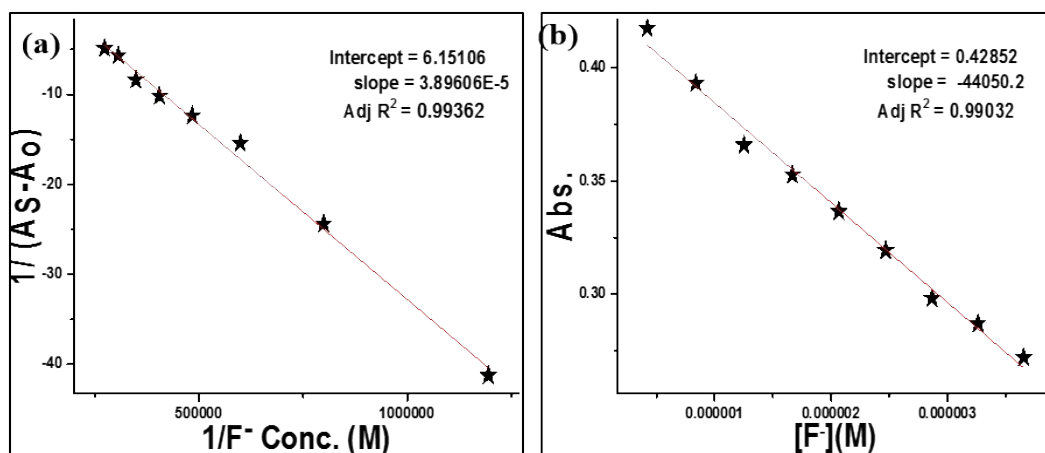

### Emission titration

**Figure S14.** Emission spectra of (a) C1 in different solvents (b) C1 in the presence of anions.

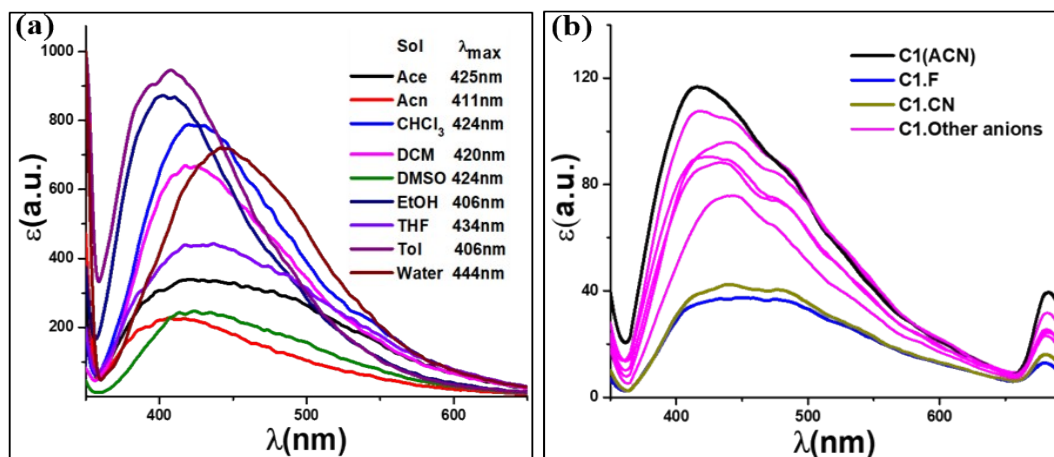

**Figure S15.** (a) Titration of C1 with  $F^-$  (b) Titration of C2 with  $F^-$  in acetonitrile. Emission spectra of C1.

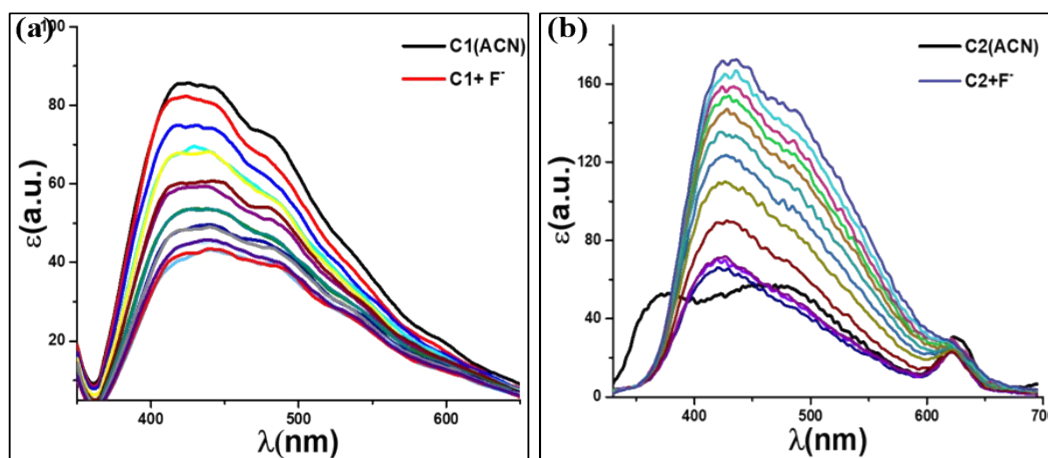

**Figure S16.** Depiction of change in absorbance of C1 and C2 with  $F^-$ .

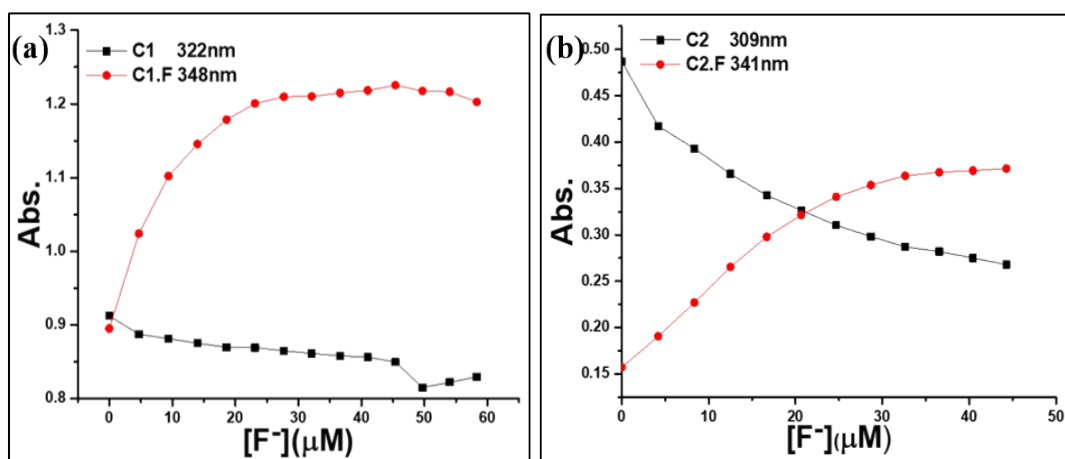

Figure S17. Depiction of change in emission intensity of C1 and C2 with  $F^-$ .

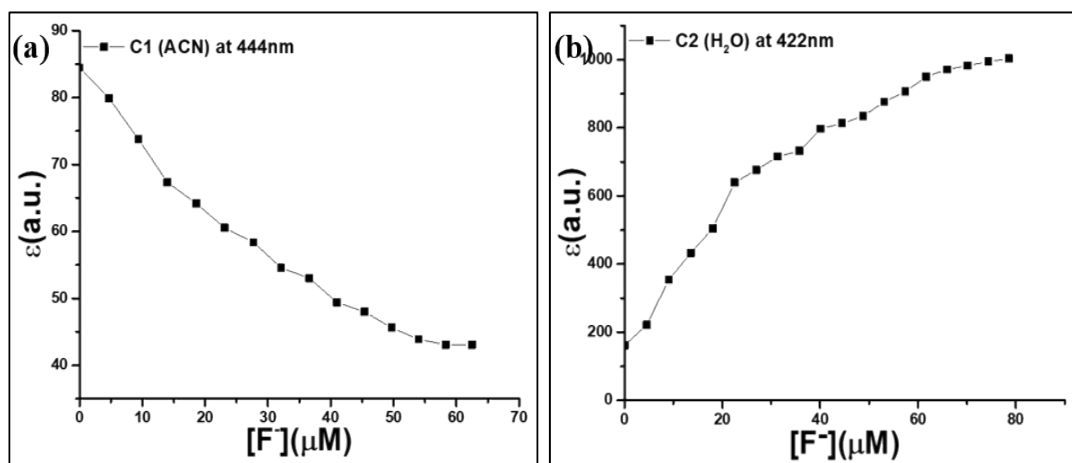

### Mysterious behavior of C1 in $\text{CHCl}_3$

Figure S18. (a) Image of C1 powder in exposure to long-range light (white fluorescence in nature). FE-SEM and solution phase image support this behavior of C1 in  $\text{CHCl}_3$ .

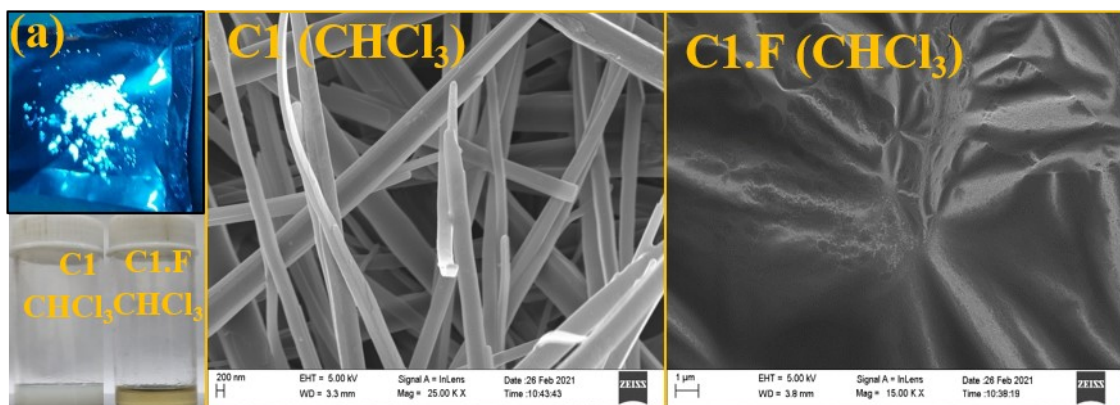

## D<sub>2</sub>O exchange of compounds in <sup>1</sup>H NMR

**Figure S19.** <sup>1</sup>H NMR (400MHz, DMSO) spectra of C1 (above) and C1 after D<sub>2</sub>O addition (below). The peak at 7.28ppm shows D<sub>2</sub>O exchange via reduced integration value.<sup>2</sup>

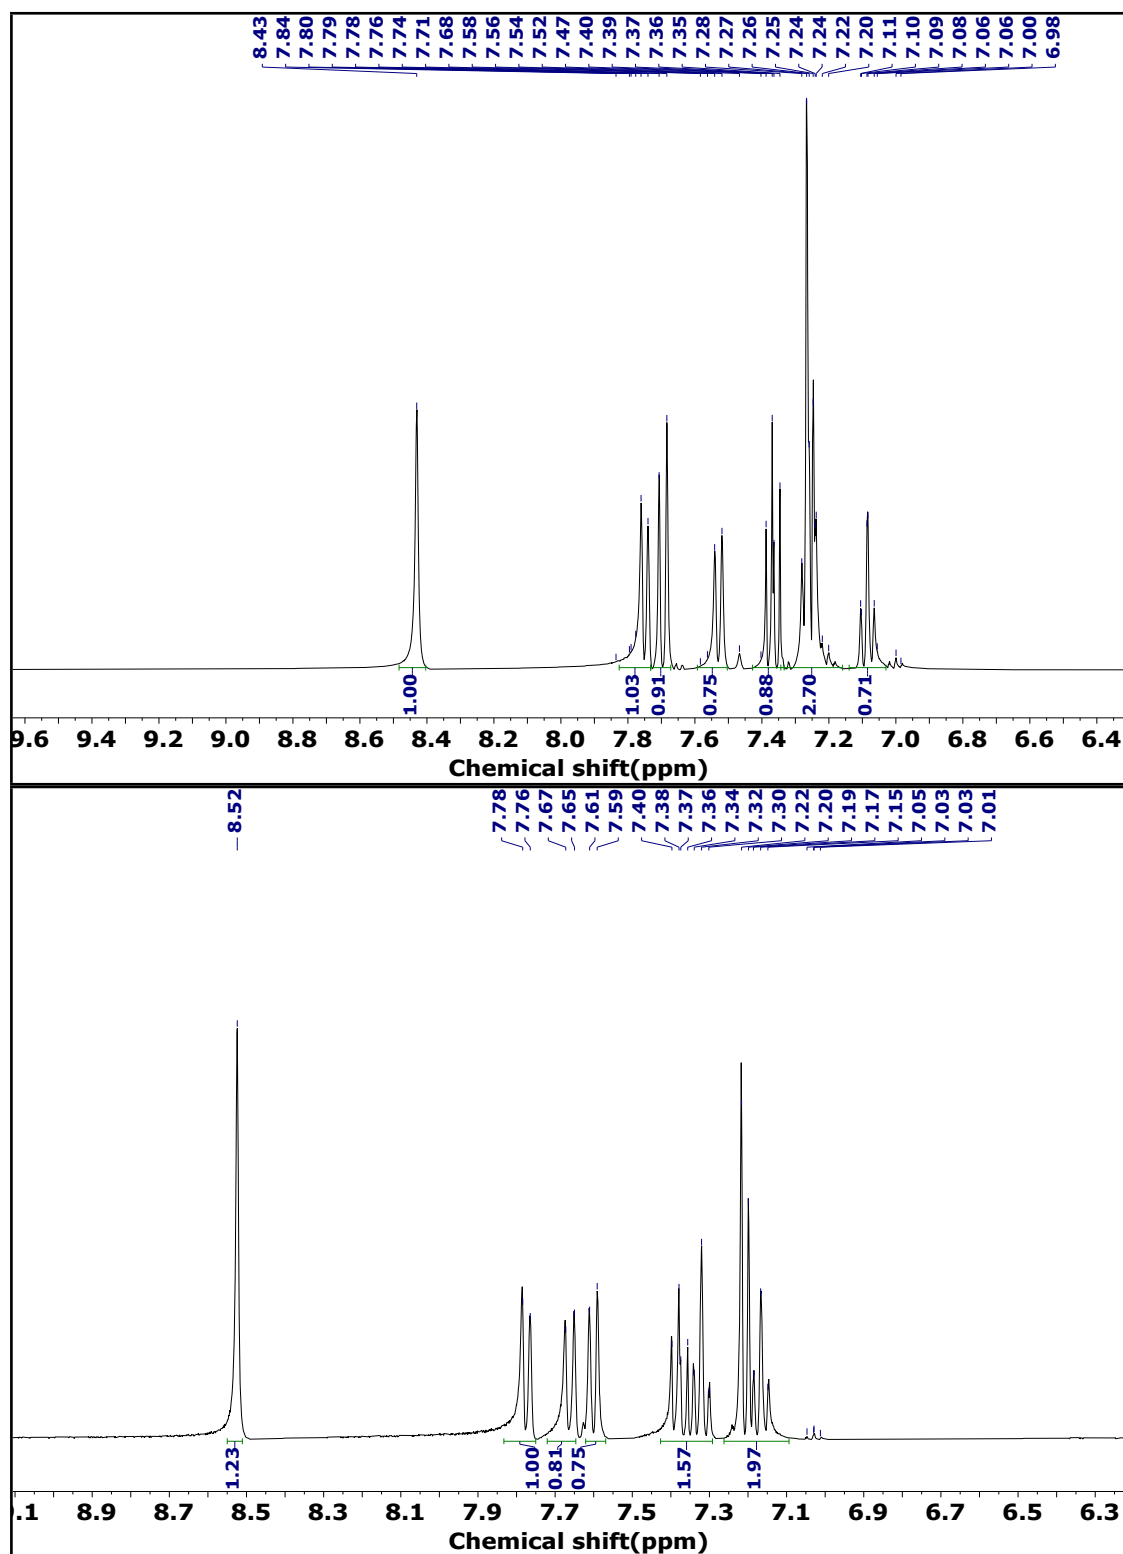

**Figure S20.**  $^1\text{H}$ NMR (400MHz, DMSO) spectra of C2 (above) and C2 after  $\text{D}_2\text{O}$  addition (below). The peak at 7.55ppm shows a  $\text{D}_2\text{O}$  exchange reaction.<sup>2</sup>

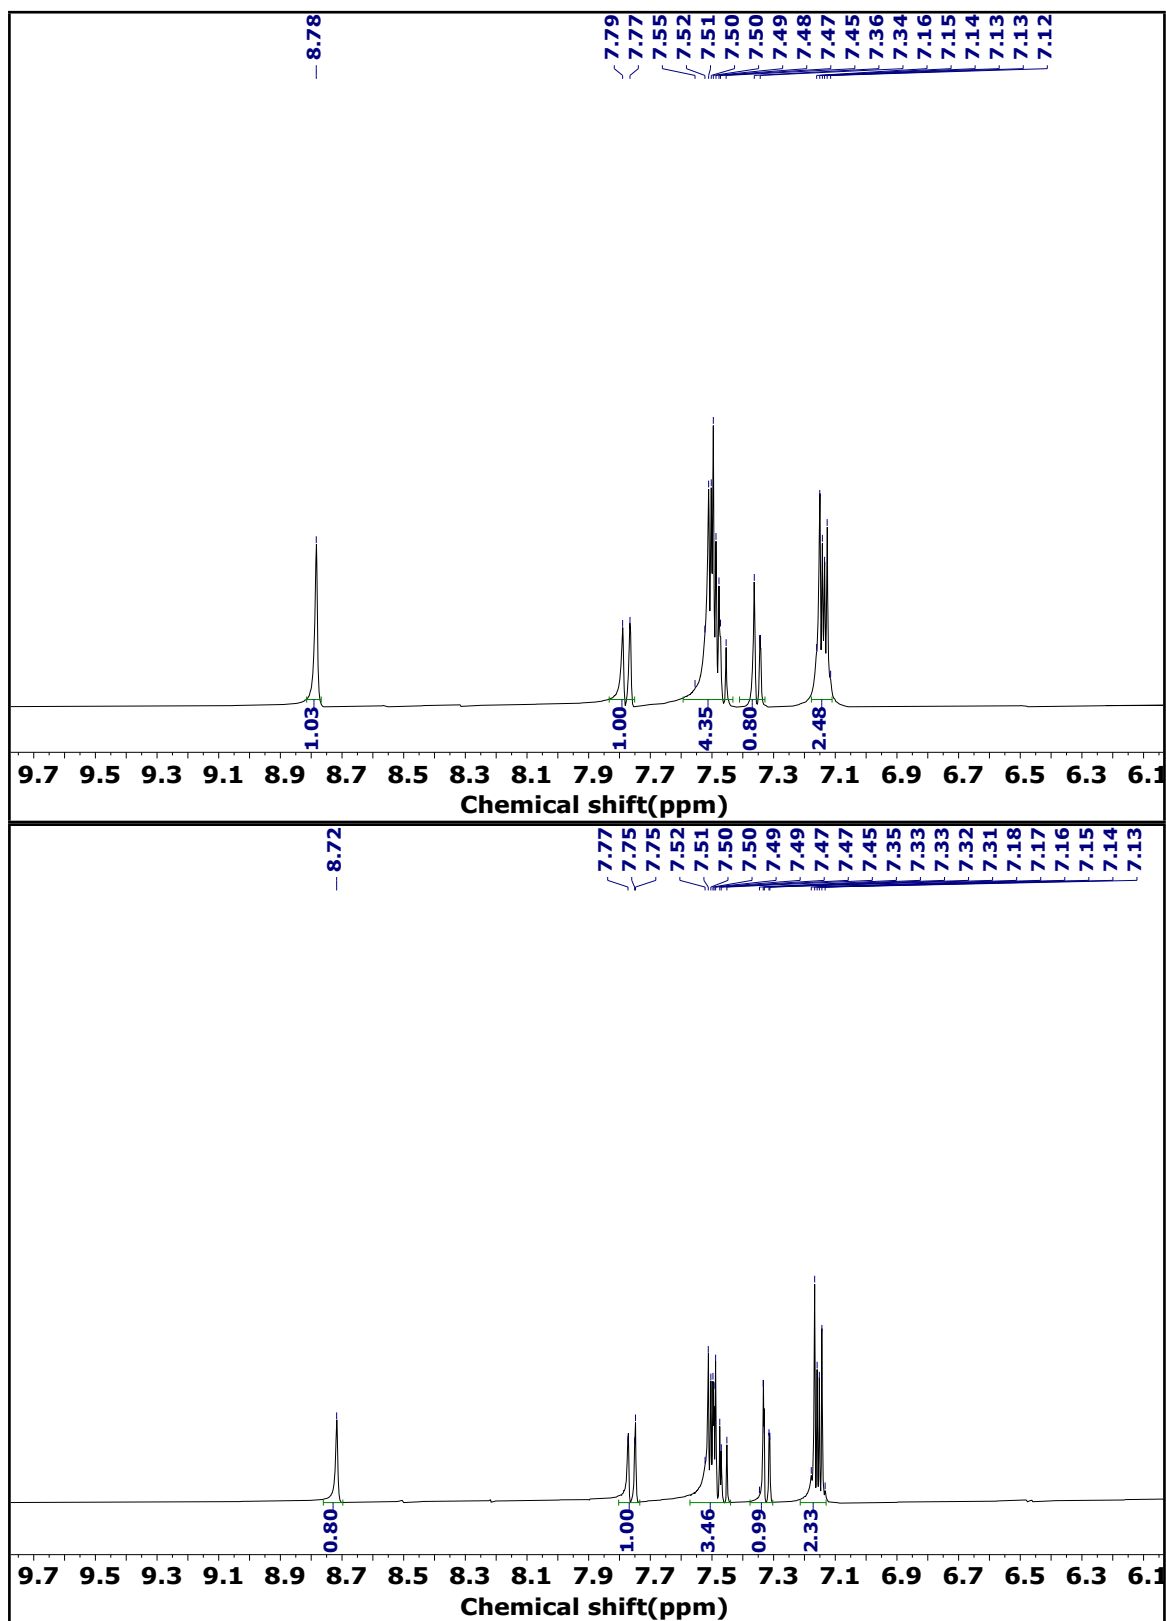

## $^1\text{H}$ and $^{19}\text{F}$ NMR spectra of complexes

**Figure S21.**  $^1\text{H}$ NMR(400 MHz,  $\text{CDCl}_3$ ) of (a)  $\text{C1.F}^-$  and (b)  $\text{C2.F}^-$  having 20eq of  $\text{F}^-$ , up to a range of 13 to 19 ppm.<sup>2,3</sup>

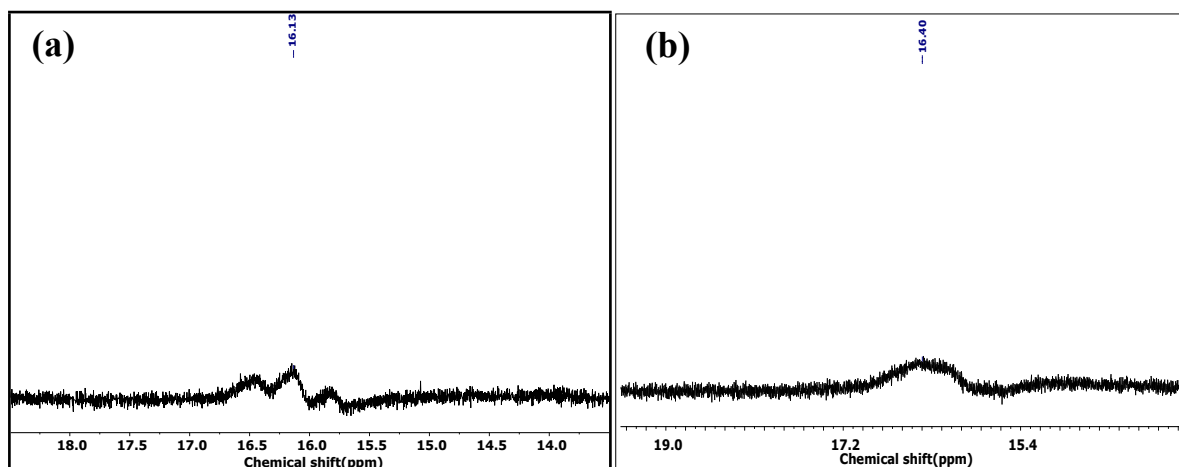

**Figure S22.**  $^{19}\text{F}$ NMR (377 MHz,  $\text{CDCl}_3$ ) spectra of  $\text{C1.F}^-$ . The desired triplet peak obtained at 144ppm signified that deprotonated fluoride ion [ $\text{H}_2.\text{F}^-$ ].<sup>3</sup>

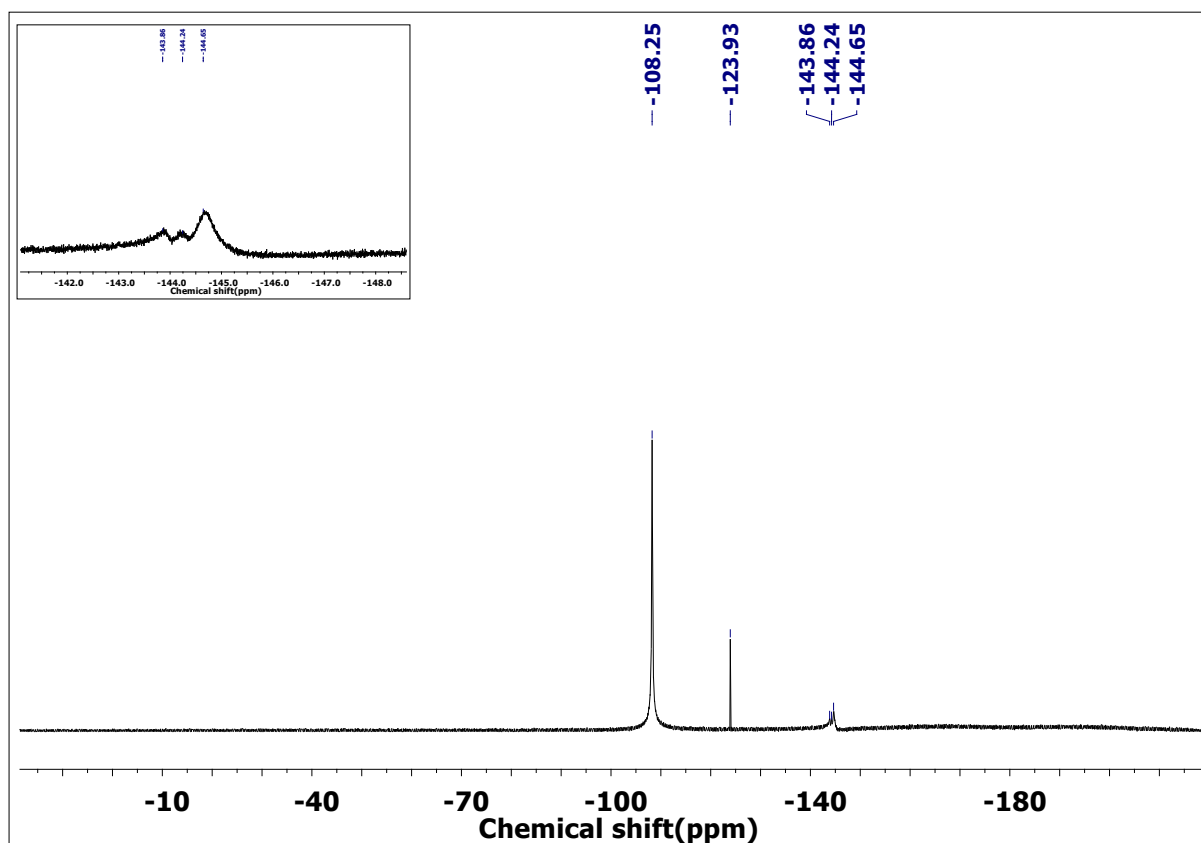

**Figure S23.**  $^{19}\text{F}$ NMR (377 MHz,  $\text{CDCl}_3$ ) spectra of  $\text{C}_2\text{F}^-$ . The desired peak between 130 to 170ppm obtained signified that deprotonated fluoride ion  $[\text{H}_2\text{F}^-]$  formed.<sup>3</sup>

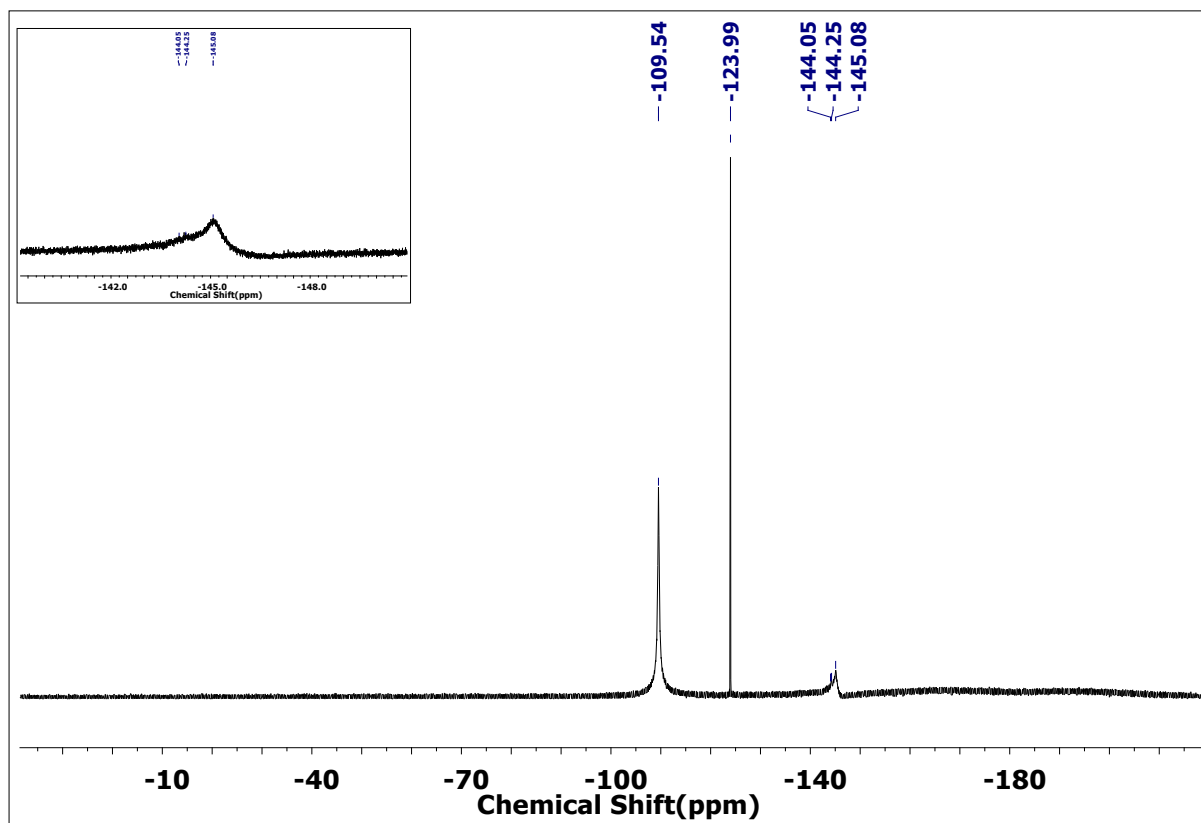

**Figure S24.**  $^{19}\text{F}$ NMR (377 MHz,  $\text{CDCl}_3$ ) spectra of  $\text{TBAF}^-$ . The desired peak was obtained at 124.62ppm.

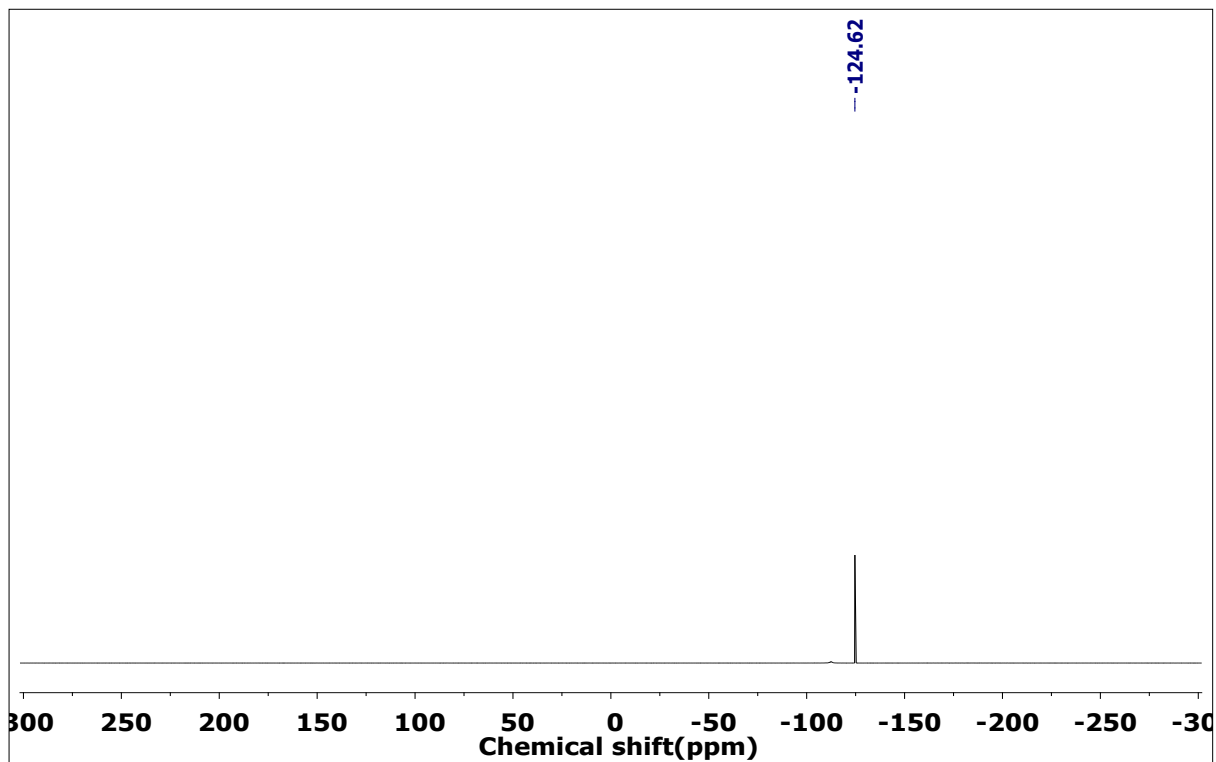

**Figure S25.** Fluoride anion concentration added versus chemical shift value of (a) C1 and (b) C2.

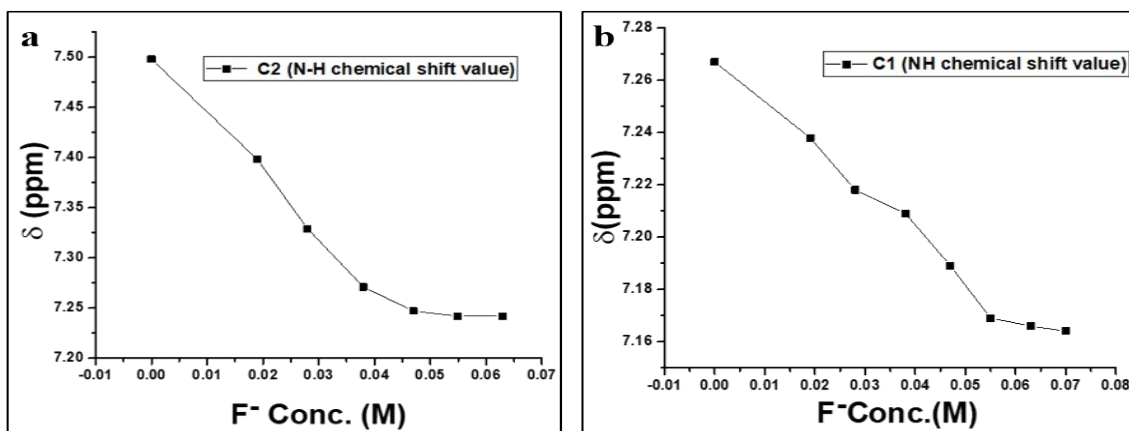

### FT-IR spectroscopy

**Figure S26.** FT-IR plots of (a) C1 and (b) C2.

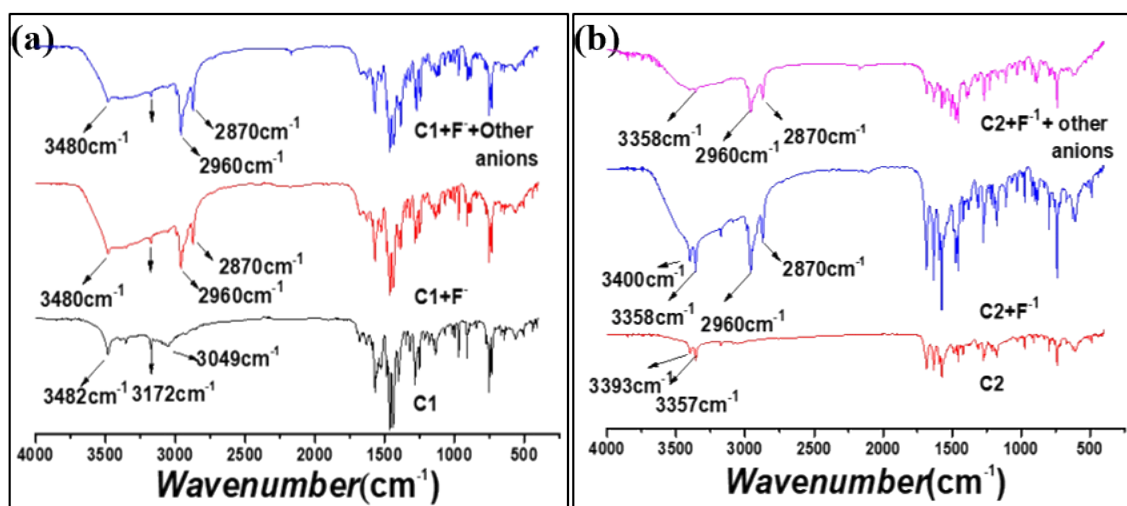

### HR-MS spectrum of complexes

**Figure S27.** ESI-HRMS spectra of C1.S (m/z calculated for [C1+F+H<sub>2</sub>O-H] = 364.0203 and obtained 364.1728)



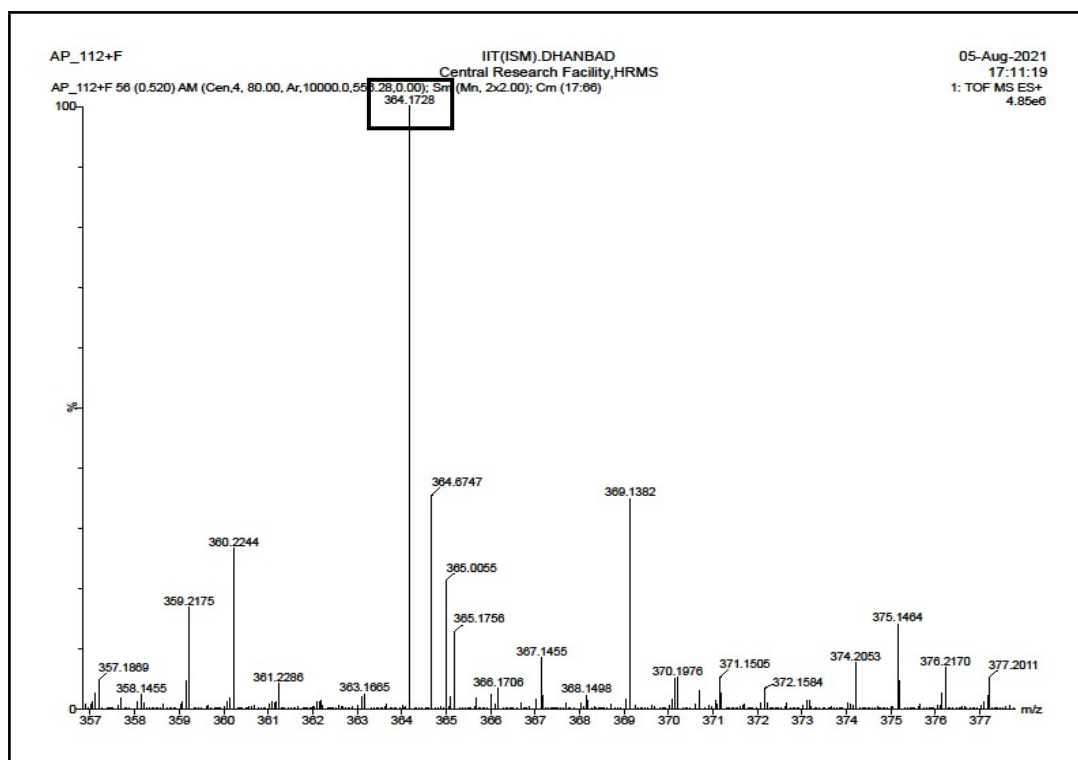

**FigureS28.** ESI-HRMS spectra of **C2.S** ( $m/z$  calculated for  $[C1+F+Na] = 353.0461$  and obtained 353.1451).

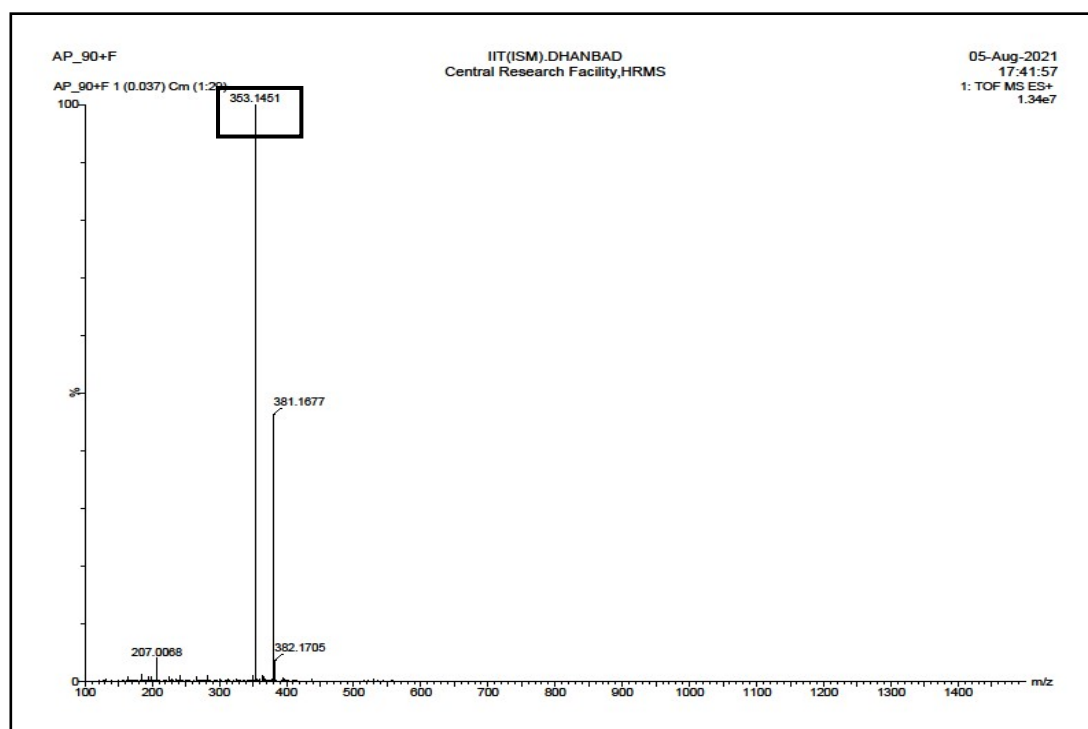

### DFT calculated optimized structure

**Figure S29.** DFT optimized C1, C2, C1.S, and C2.S using B3LYP /3-21G basis set on the Gaussian09 program.

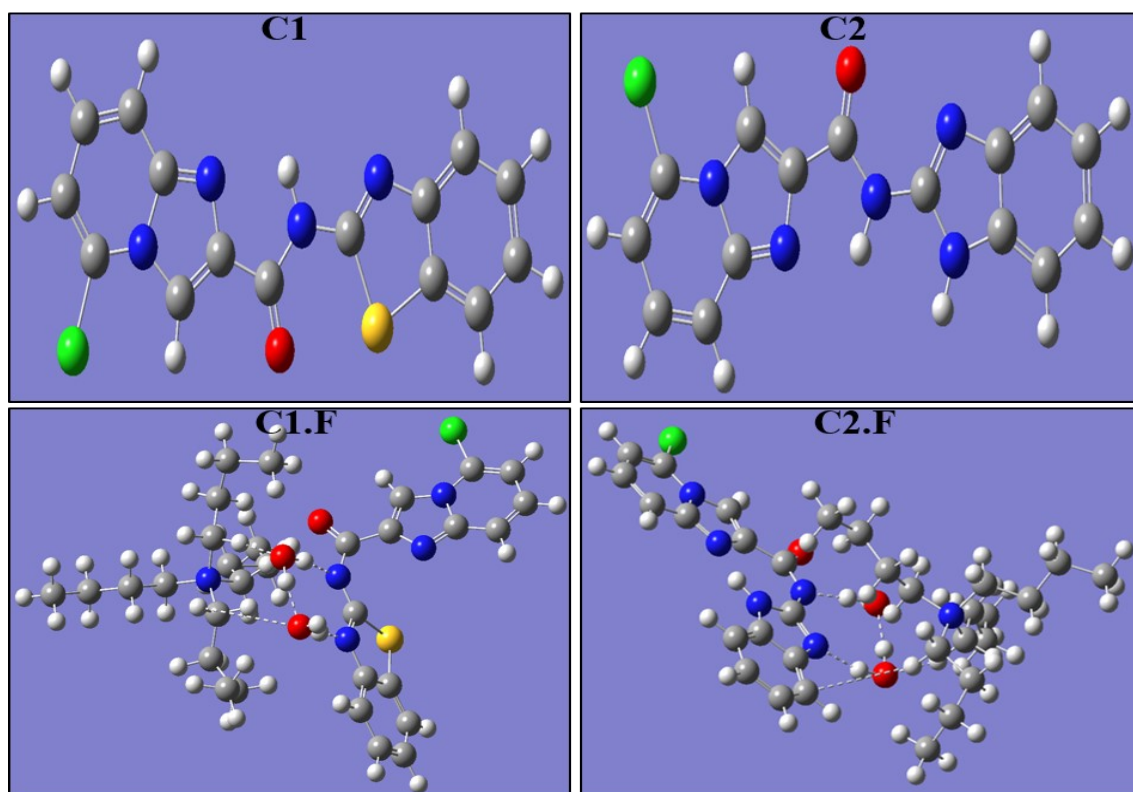

### Titration plot of carboxamide with CN<sup>-</sup>

**Figure S30.** Absorption titration spectra of (a) C1 and (b) C2 with CN<sup>-</sup>.

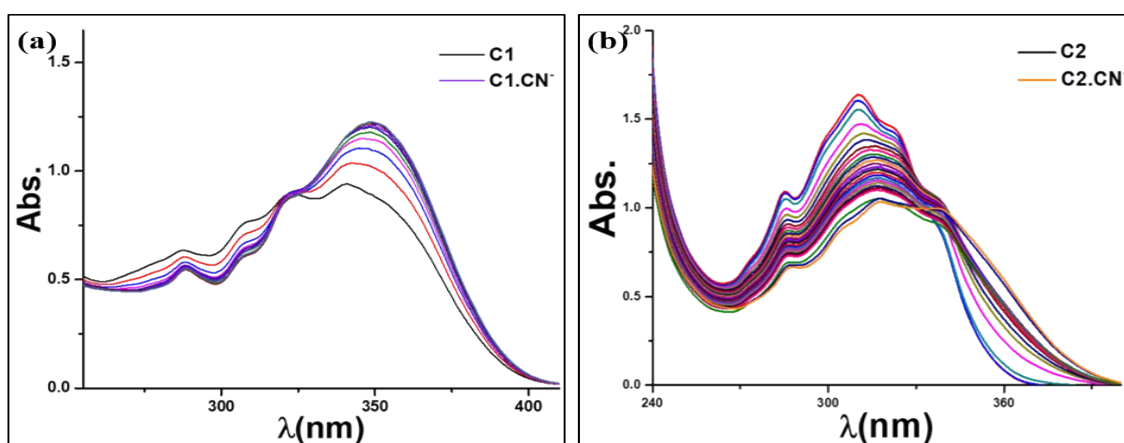

**Figure S31.** <sup>1</sup>H NMR titration profile of C1 with cyanide anion.

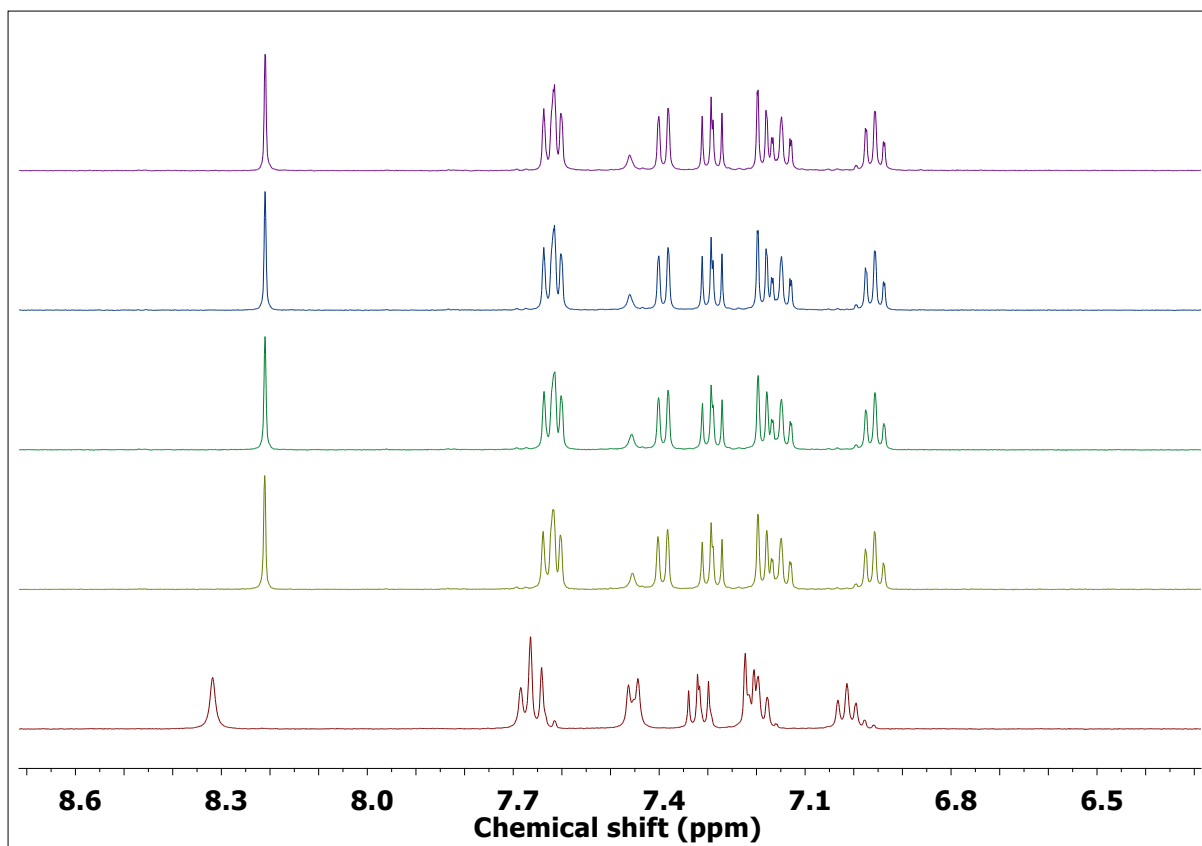

**Figure S32.**  $^1\text{H}$ NMR titration profile of C2 with cyanide anion.

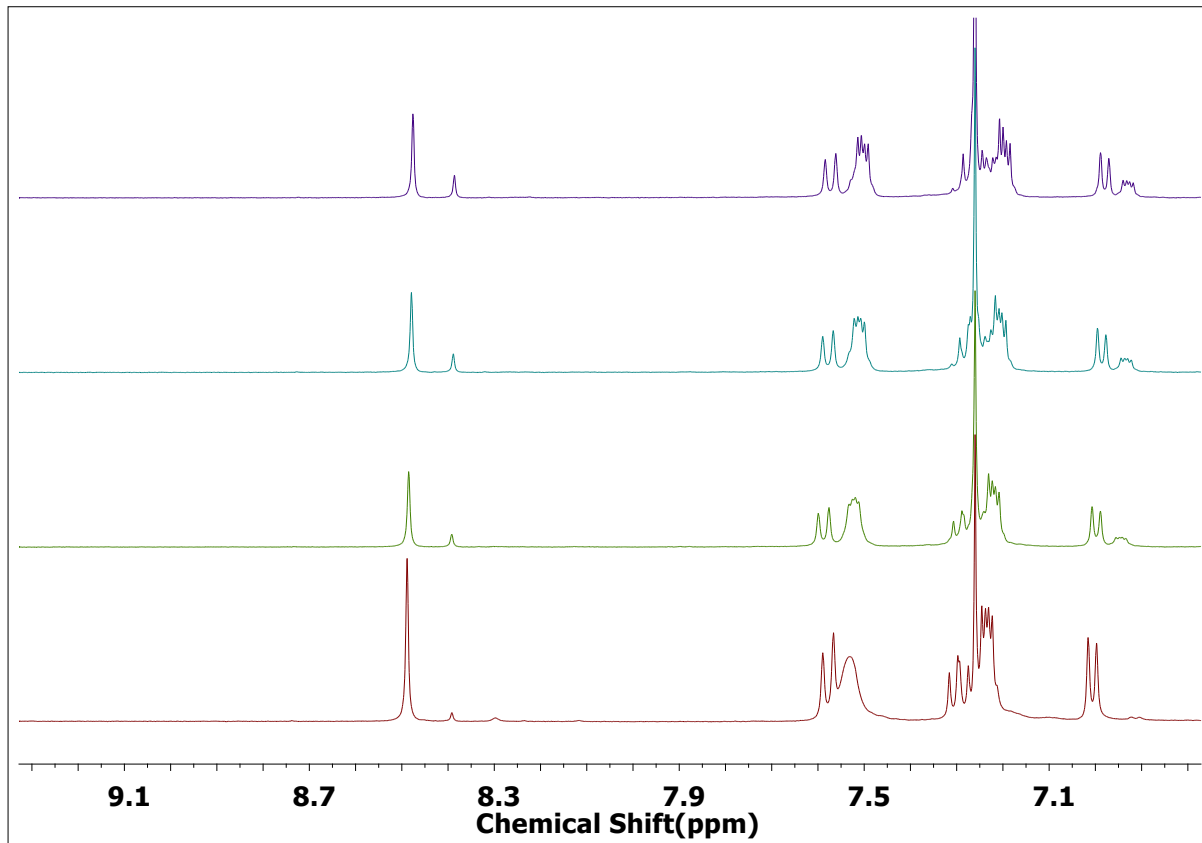

## FE-SEM image

**Figure S33** FESAM image of (a) C1,(b) C1.S,(c) C2,and (d) C2.S. Sample prepared in DMSO for C1 and C1.S and in water for C2 and C2.S through drop caste method.

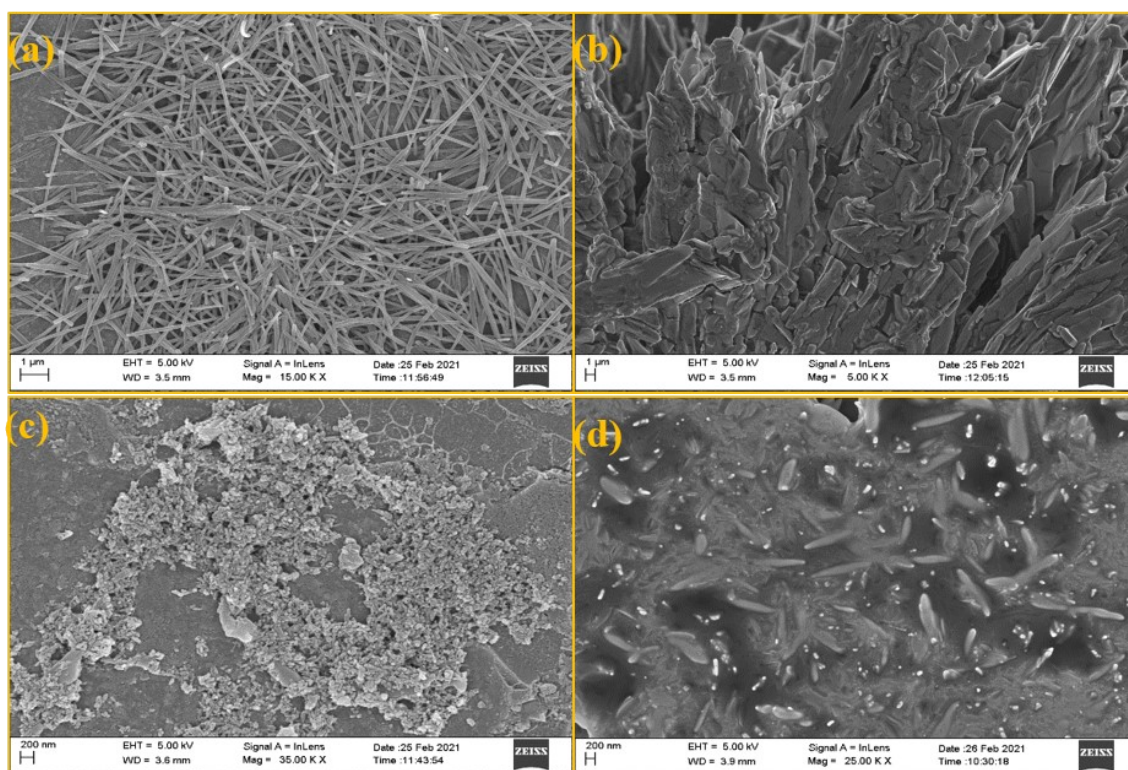

## References

1. (a) J. Wu, G. Lai, Z. Li, Y. Lu, T. Leng, Y. Shen and C. Wang, *Dye. Pigment.*, 2016, **124**, 268–276. (b) N. Kaur and G. Jindal, *Spectrochim. Acta - Part A Mol. Biomol. Spectrosc.*, 2019, **223**, 1–7.
2. N. Luo, J. Li, T. Sun, S. Wan, P. Li, N. Wu, Y. Yan and X. Bao, *RSC Adv.*, 2021, **11**, 10203–10211.
3. (a) H. J. Han, J. H. Oh, J. L. Sessler and S. K. Kim, *Chem. Commun.*, 2019, **55**, 10876–10879. (b) M. Goursaud, P. De Bernardin, A. Dalla Cort, K. Bartik and G. Bruylants, *European J. Org. Chem.*, 2012, **2012**, 3570–3574.
